# Supplementary material for: Choose wisely: imaging for diagnosis of axial spondyloarthritis
Source: HighWire-hosted journal article supplement (doi:10.1136/annrheumdis-2021-220136), 2021-05-28
Supplement: annrheumdis-2021-220136supp004_data_supplement.pdf [file annrheumdis-2021-220136supp004_data_supplement.pdf]

| Modality     | Symptom duration in months [mean $\pm$ SD] in patients with |    |                             |    | p-value |
|--------------|-------------------------------------------------------------|----|-----------------------------|----|---------|
|              | Correct imaging diagnosis                                   | n  | Incorrect imaging diagnosis | n  |         |
| <b>XR</b>    | 90.6 $\pm$ 98.5                                             | 68 | 67.3 $\pm$ 79.4             | 36 | 0.27    |
| <b>CT</b>    | 82.9 $\pm$ 91.7                                             | 87 | 80.59 $\pm$ 103.1           | 17 | 0.44    |
| <b>MR</b>    | 85.5 $\pm$ 93.8                                             | 88 | 66.2 $\pm$ 86.7             | 16 | 0.34    |
| <b>XR+MR</b> | 86.5 $\pm$ 94.2                                             | 86 | 63.8 $\pm$ 84.4             | 18 | 0.17    |
| <b>CT+MR</b> | 81.1 $\pm$ 88.4                                             | 87 | 90.1 $\pm$ 114.7            | 17 | 0.65    |

**Supplement 4 - Symptom duration in relation to the accuracy of imaging diagnosis.** The Mann-Whitney U-test was performed for each modality comparing symptom duration in the group with a correct diagnosis with that in the group with an incorrect diagnosis. All tests were non-significant with a tendency towards longer symptom duration in patients with a correct diagnosis in XR and MR. Symptom duration was not available for all patients.
